# Supplementary material for: Unveiling the Dual Nature of Heavy Metals: Stressors and Promoters of Phenolic Compound Biosynthesis in Basilicum polystachyon (L.) Moench In Vitro
Source: MDPI journal article supplement (doi:10.3390/plants13010098), 2023-12-28
Supplement: s1 [file s1]

# Unveiling the Dual Nature of Heavy Metals: Stressors and Promoters of Phenolic Compound Biosynthesis in *Basilicum polystachyon* (L.) Moench In Vitro

Sumanta Das <sup>1,\*</sup>, Kaniz Wahida Sultana <sup>1</sup>, Moupriya Mondal <sup>1</sup>, Indrani Chandra <sup>1,\*</sup>  
and Ashwell R. Ndhlala <sup>2</sup>

<sup>1</sup> Department of Biotechnology, The University of Burdwan, Burdwan 713104, West Bengal, India; kwsultana@gmail.com (K.W.S.); moupriyamondal652@gmail.com (M.M.)

<sup>2</sup> Department of Plant Production, Soil Science and Agricultural Engineering, Green Biotechnologies Research Centre of Excellence, University of Limpopo, Private Bag X1106, Sovenga 0727, South Africa

\* Correspondence: sumantad1991@gmail.com (S.D.); ichandrabiotech@gmail.com (I.C.)

**Supplementary Table S1.** Program for gradient elution using a mobile phase consisting of (A) 2% glacial acetic acid in water and (B) acetonitrile: water (70:30).

| Time (min) | Solvent A (2% Glacial acetic Acid in Water) | Solvent B (Acetonitrile: Water) 70:30 |
|------------|---------------------------------------------|---------------------------------------|
| 0-3        | 95                                          | 5                                     |
| 3-10       | 80                                          | 20                                    |
| 10-20      | 60                                          | 40                                    |
| 20-30      | 20                                          | 80                                    |
| 30-50      | 95                                          | 5                                     |

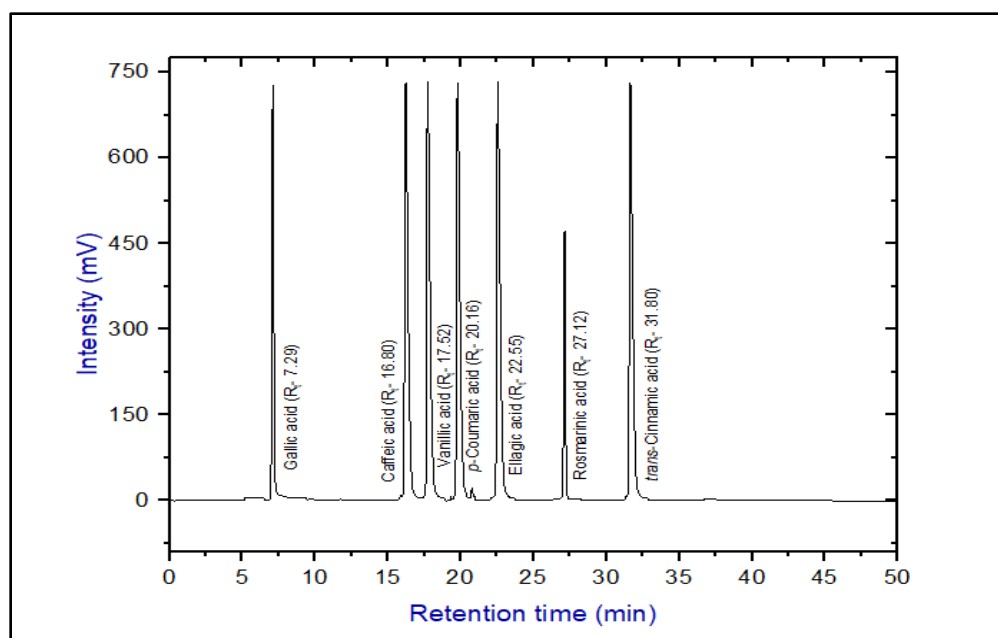

**Supplementary Figure S1.** HPLC chromatogram of standard phenolic acids: Gallic acid ( $R_t$ -7.29), Caffeic acid ( $R_t$ -16.80), Vanillic acid ( $R_t$ -17.52), *p*-Coumaric acid ( $R_t$ -20.16), Ellagic acid ( $R_t$ -22.55), Rosmarinic acid ( $R_t$ -27.12), *trans*-Cinnamic acid ( $R_t$ -31.80).

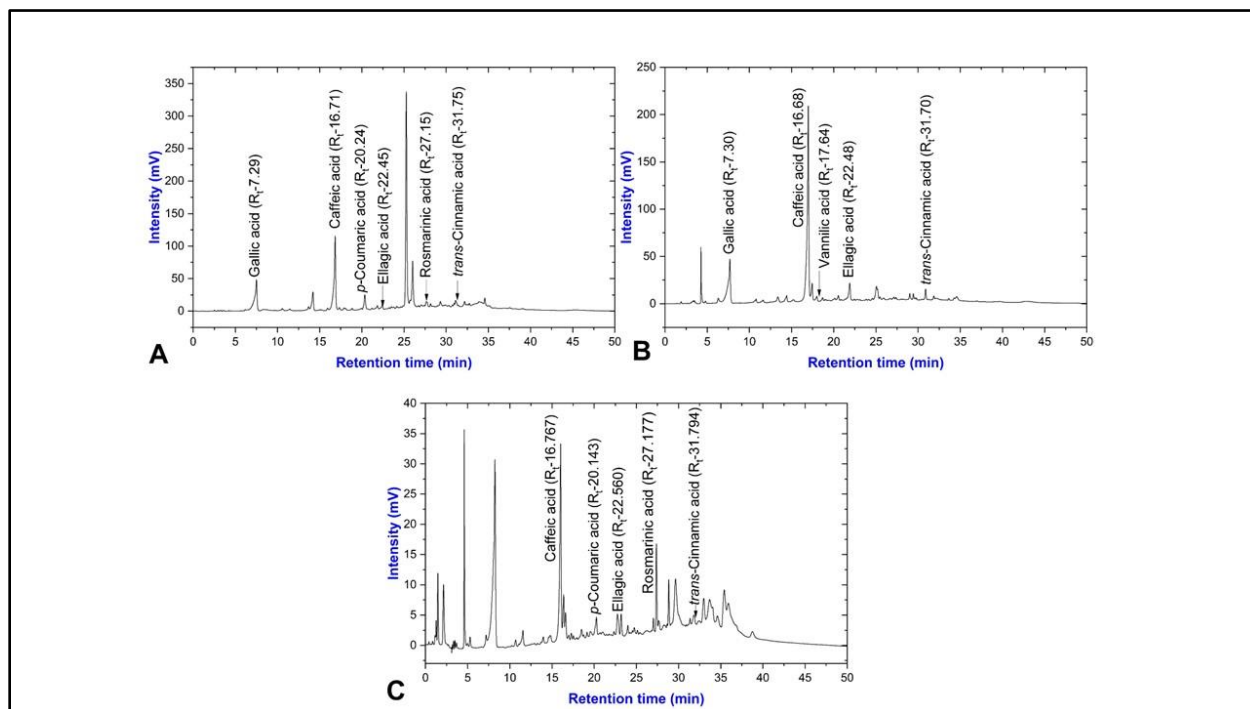

**Supplementary Figure S2.** HPLC chromatographic profile of phenolic compounds obtained in the leaves of lead (II) induced plant. (A) Free form phenolics, (B) Esterified form phenolics, and (C) Glycosylated form phenolics.

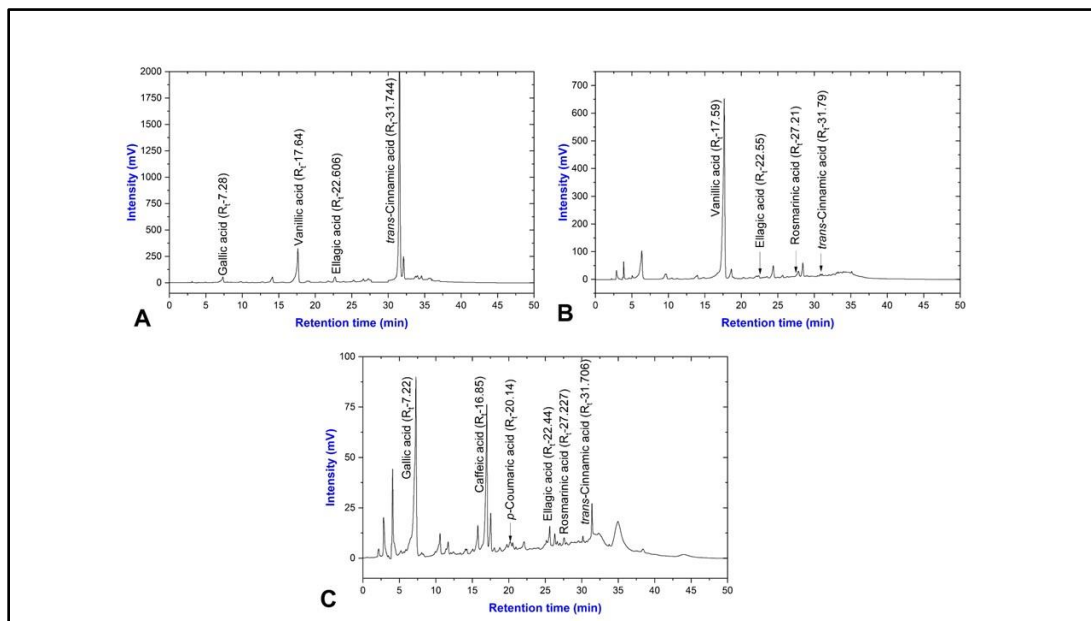

**Supplementary Figure S3.** HPLC chromatographic profile of phenolic compounds obtained in the leaves of mercury (II) induced plant. (A) Free form phenolics, (B) Esterified form phenolics, and (C) Glycosylated form phenolics.

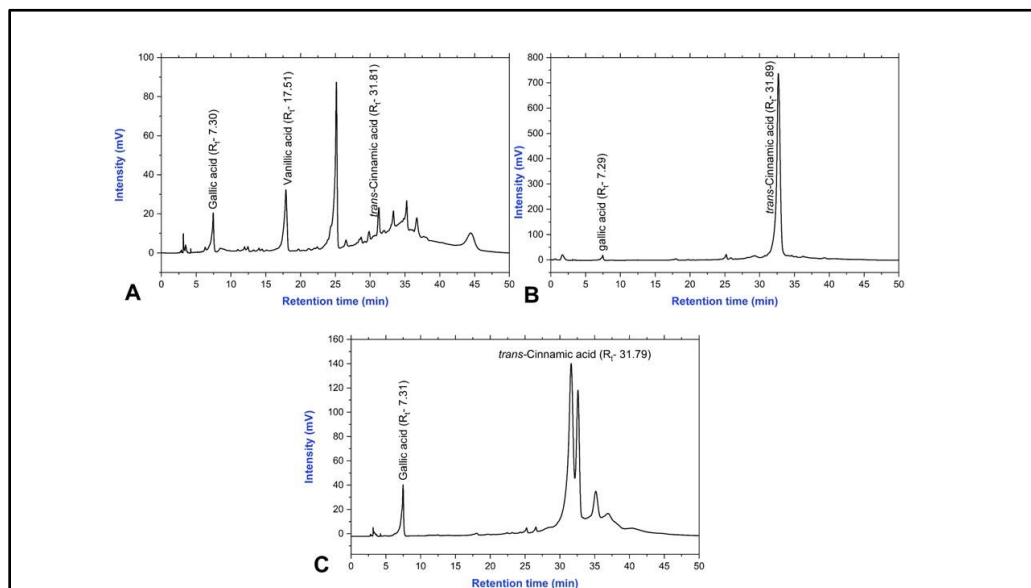

**Supplementary Figure S4.** HPLC chromatographic profile of phenolic compounds obtained in the leaves of the control plant. (A) Free form phenolics, (B) Esterified form phenolics, and (C) Glycosylated form phenolics.
